# Supplementary material
Source: Springer Nature journal article supplement (https://www.springermedizin.de/resource/supplementary/12935_2010_264_MOESM5_ESM.pdf/9540200)

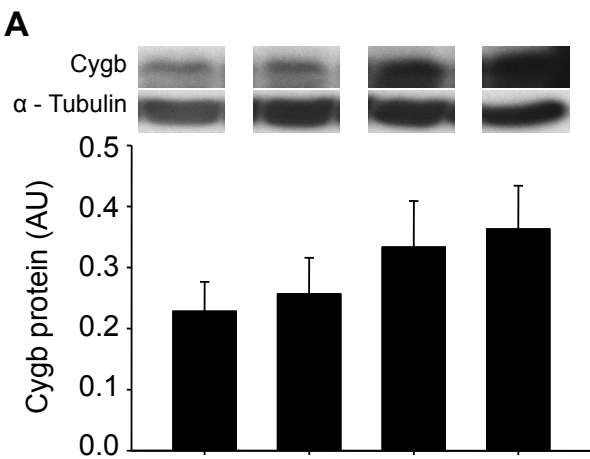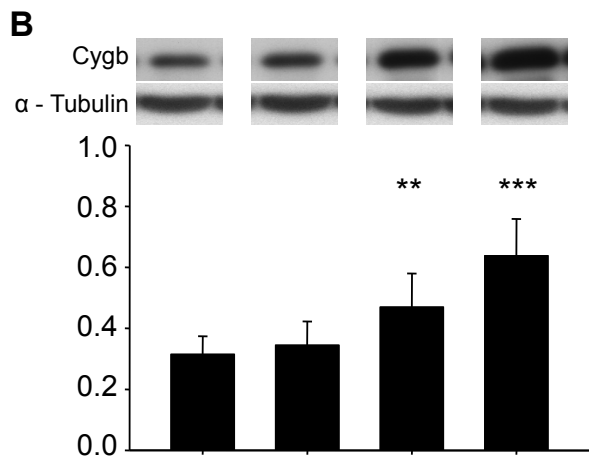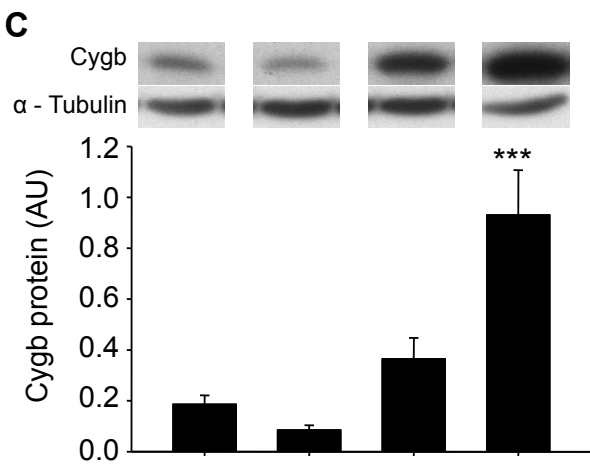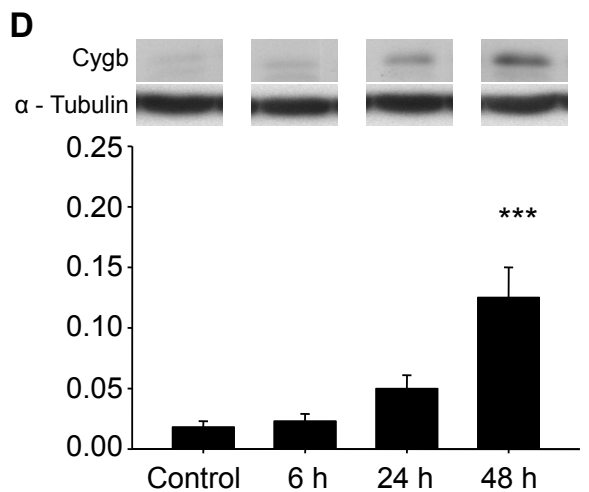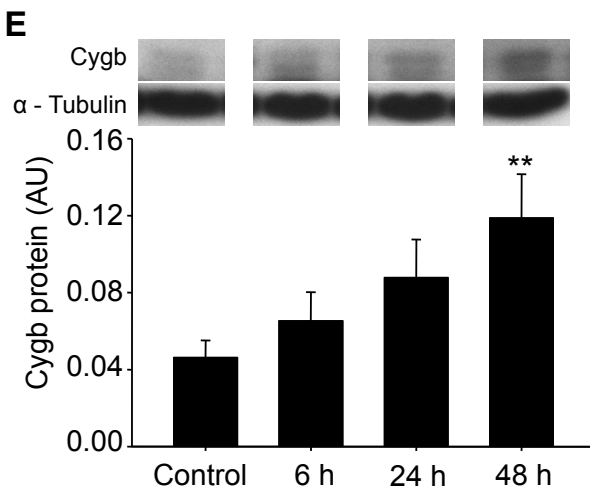

Supplement: MOESM5 [file 9540200]
